# Supplementary material
Source: PubMed Central journal article supplement (PMC4528366)
Supplement: NIHMS689703-supplement-3.pdf [file NIHMS689703-supplement-3.pdf]

## Original research article

### Estimating added sugars in US consumer packaged goods: An application to beverages in 2007–08

Shu Wen Ng\*, Gregory Bricker, Kuo-ping Li, Emily Ford Yoon, Jiyoung Kang, Brian Westrich  
\*Corresponding author. shuwen@unc.edu

## Supplementary Appendices

1. Appendix A. Calculating Z, the total model error for a chocolate milk example
2. Appendix B. Macronutrient values (LP estimated to NFL) and added sugar estimates across beverage categories
3. Appendix C. Results of small validation test and 'manufacturer  $\leq 2\%$ ' constraint sensitivity test based on 15 known formulations

**Appendix A. Calculating Z, the total model error for a chocolate milk example**

| <b>Nutrient or weight parameters</b>                 | <b>NFL amount/100 g</b> | <b>LP estimated amount/100 g</b> | <b>Absolute difference</b> | <b>Value equivalent to 1 tolerance unit (from Table 1)</b> | <b>Tolerance units (error)</b> |
|------------------------------------------------------|-------------------------|----------------------------------|----------------------------|------------------------------------------------------------|--------------------------------|
| Weight (g)                                           | 100                     | 100                              | 0                          | ±5                                                         | 0.000                          |
| Calories (kcal)                                      | 52.73                   | 54.71                            | 1.98                       | ±85                                                        | 0.023                          |
| Total fat (g)                                        | 1.22                    | 1.08                             | 0.14                       | ±2.5                                                       | 0.056                          |
| Saturated fat (g)                                    | 0.81                    | 0.66                             | 0.15                       | ±2.5                                                       | 0.060                          |
| Cholesterol (mg)                                     | 4.05                    | 5.38                             | 1.33                       | ±30                                                        | 0.044                          |
| Sodium (mg)                                          | 113.58                  | 113.58                           | 0                          | ±100                                                       | 0.000                          |
| Carbohydrate (g)                                     | 8.11                    | 8.09                             | 0.02                       | ±10                                                        | 0.002                          |
| Total Sugar (g)                                      | 7.3                     | 7.3                              | 0                          | ±10                                                        | 0.000                          |
| Fiber (g)                                            | 0.41                    | 0.38                             | 0.03                       | ±2.5                                                       | 0.012                          |
| Protein (g)                                          | 3.65                    | 3.65                             | 0                          | ±5                                                         | 0.000                          |
| Potassium (mg)                                       | 182.53                  | 182.53                           | 0                          | ±100                                                       | 0.000                          |
| <b>Sum of tolerance units, Z (total model error)</b> |                         |                                  |                            |                                                            | <b>0.198</b>                   |
| <b>Mean error per nutrient and weight parameter</b>  |                         |                                  |                            |                                                            | <b>0.018</b>                   |

## Appendix B. Macronutrient values (LP estimated to NFL) and added sugar estimates across beverage categories

| Beverage category                            | Caloric sodas & energy drinks |        |      | Sports drinks |         |      | Flavored water – carbonated & still |        |      | Fruit & vegetable juice drinks |        |      | Fruit flavored drinks |         |       |
|----------------------------------------------|-------------------------------|--------|------|---------------|---------|------|-------------------------------------|--------|------|--------------------------------|--------|------|-----------------------|---------|-------|
|                                              | n                             | mean   | SD   | n             | mean    | SD   | n                                   | mean   | SD   | n                              | mean   | SD   | n                     | mean    | SD    |
| <b># of unique products in 2007-08</b>       |                               |        |      |               |         |      |                                     |        |      |                                |        |      |                       |         |       |
| with NFL total sugar >0g                     | 1711                          |        |      | 290           |         |      | 331                                 |        |      | 1649                           |        |      | 183                   |         |       |
| with estimated added sugar >0g               | 1695                          |        |      | 290           |         |      | 297                                 |        |      | 1524                           |        |      | 183                   |         |       |
| <b>LP to NFL macronutrient comparisons</b>   |                               |        |      |               |         |      |                                     |        |      |                                |        |      |                       |         |       |
| Absolute Differences (per 100g) <sup>†</sup> |                               |        |      |               |         |      |                                     |        |      |                                |        |      |                       |         |       |
| Calories (kcal)                              | 1711                          | 2.26   | 2.64 | 290           | 1.78    | 1.32 | 335                                 | 1.05   | 1.48 | 1652                           | 2.05   | 5.99 | 183                   | 3.92    | 19.98 |
| Total fat (g)                                | 7                             | 0.01   | 0.03 | 0             |         |      | 6                                   | 0.11   | 0.17 | 44                             | 0.73   | 1.06 | 1                     | 0.05    |       |
| Saturated fat (g)                            | 2                             | 0.08   | 0.07 | 0             |         |      | 2                                   | 0.05   | 0.07 | 22                             | 0.49   | 0.33 | 0                     |         |       |
| Carbohydrate (g)                             | 1711                          | 0.06   | 0.52 | 290           | 0.01    | 0.06 | 335                                 | 0.04   | 0.18 | 1652                           | 0.13   | 0.99 | 183                   | 0.68    | 5.08  |
| Total sugar (g)                              | 1711                          | 0.16   | 0.62 | 290           | 0.07    | 0.08 | 331                                 | 0.09   | 0.34 | 1649                           | 0.21   | 0.65 | 183                   | 0.38    | 3.81  |
| Protein (g)                                  | 61                            | 0.34   | 0.39 | 1             | 0.00    |      | 14                                  | 0.05   | 0.12 | 220                            | 0.22   | 0.28 | 4                     | 0.42    | 0.04  |
| <b>Nutrient Ratios (LP/NFL)</b>              |                               |        |      |               |         |      |                                     |        |      |                                |        |      |                       |         |       |
| Calories                                     | 1711                          | 1.03   | 0.07 | 290           | 1.08    | 0.14 | 335                                 | 1.04   | 0.20 | 1652                           | 1.01   | 0.16 | 183                   | 1.06    | 0.69  |
| Total fat                                    | 7                             | 0.86   | 0.37 | 0             |         |      | 6                                   | 0.78   | 0.40 | 44                             | 1.98   | 2.21 | 1                     | 0.02    |       |
| Saturated fat                                | 2                             | 1.36   | 0.64 | 0             |         |      | 2                                   | 1.16   | 0.23 | 22                             | 3.31   | 2.77 | 0                     |         |       |
| Carbohydrate                                 | 1711                          | 1.00   | 0.04 | 290           | 1.01    | 0.07 | 335                                 | 1.01   | 0.06 | 1652                           | 1.01   | 0.10 | 183                   | 1.08    | 0.75  |
| Total sugar                                  | 1711                          | 0.99   | 0.05 | 290           | 0.99    | 0.07 | 331                                 | 0.97   | 0.22 | 1649                           | 1.00   | 0.24 | 183                   | 1.04    | 0.70  |
| Protein                                      | 61                            | 0.19   | 0.35 | 1             | 1.00    |      | 14                                  | 0.98   | 0.47 | 220                            | 0.73   | 0.65 | 4                     | 0.00    | 0.00  |
| <b>Added sugar estimate (per 100g)</b>       |                               |        |      |               |         |      |                                     |        |      |                                |        |      |                       |         |       |
| Among all UPCs                               | 1711                          | 10.79  | 2.31 | 290           | 5.21    | 1.63 | 335                                 | 4.26   | 3.25 | 1652                           | 7.98   | 3.86 | 191                   | 7.70    | 5.06  |
| Among UPCs with NFL total sugar >0g          | 1711                          | 10.79  | 2.31 | 290           | 5.21    | 1.63 | 331                                 | 4.31   | 3.23 | 1649                           | 8.00   | 3.84 | 183                   | 8.03    | 4.90  |
| <b>Added sugar as % of :</b>                 |                               |        |      |               |         |      |                                     |        |      |                                |        |      |                       |         |       |
| total sugar among UPCs with total sugar >0g  | 1711                          | 95.86% |      | 290           | 97.41%  |      | 331                                 | 93.37% |      | 1649                           | 75.21% |      | 183                   | 101.91% |       |
| calories among UPCs with total sugar >0g     | 1711                          | 98.25% |      | 290           | 101.46% |      | 331                                 | 91.54% |      | 1649                           | 71.06% |      | 183                   | 97.53%  |       |
| calories among UPCs with added sugar >0g     | 1695                          | 98.60% |      | 290           | 101.46% |      | 297                                 | 95.43% |      | 1524                           | 75.51% |      | 183                   | 97.53%  |       |
| <b>Other Diagnostics</b>                     |                               |        |      |               |         |      |                                     |        |      |                                |        |      |                       |         |       |
| % with LP added sugar ≤ NFL total sugar      |                               | 98.95% |      |               | 99.66%  |      |                                     | 99.40% |      |                                | 98.55% |      |                       | 98.95%  |       |
| Median total error per nutrient and weight   |                               | 0.008  |      |               | 0.006   |      |                                     | 0.003  |      |                                | 0.010  |      |                       | 0.004   |       |

**Notes:** LP= Linear programming; NFL= Nutrition Facts Label; UPC= Universal Product Code; SD= Standard deviation.

Estimated values from LP model when fruit juice and fruit juice concentrate not considered an added sugar. Added sugar (g) values only include the proportion of added sugar ingredients that are sugar. Some beverage categories contain both regular and low calorie products. Ns represent products with non-missing or non-zero NFP values. <sup>†</sup> in order to be consistent with the sample sizes presented for the Nutrient Ratios, we have limited these to the same products.

## Appendix B (cont.) Macronutrient values (LP estimated to NFL) and added sugar estimates across beverage categories

| Beverage category                            | Sweetened dairy & dairy alternatives |        |      | Ready-to-drink coffees and teas |        |      | Concentrated fruit drinks |        |       | Powdered beverage mixes |        |       | Cocktail mixes |        |       |
|----------------------------------------------|--------------------------------------|--------|------|---------------------------------|--------|------|---------------------------|--------|-------|-------------------------|--------|-------|----------------|--------|-------|
|                                              | n                                    | mean   | SD   | n                               | mean   | SD   | n                         | mean   | SD    | n                       | mean   | SD    | n              | mean   | SD    |
| <b># of unique products in 2007-08</b>       |                                      |        |      |                                 |        |      |                           |        |       |                         |        |       |                |        |       |
| with NFL total sugar >0g                     | 860                                  |        |      | 742                             |        |      | 130                       |        |       | 942                     |        |       | 183            |        |       |
| with estimated added sugar >0g               | 829                                  |        |      | 712                             |        |      | 124                       |        |       | 901                     |        |       | 174            |        |       |
| <b>LP to NFL macronutrient comparisons</b>   |                                      |        |      |                                 |        |      |                           |        |       |                         |        |       |                |        |       |
| Absolute Differences (per 100g) <sup>†</sup> |                                      |        |      |                                 |        |      |                           |        |       |                         |        |       |                |        |       |
| Calories (kcal)                              | 867                                  | 3.80   | 5.47 | 769                             | 2.19   | 6.37 | 130                       | 7.04   | 11.03 | 942                     | 19.69  | 22.44 | 184            | 4.35   | 10.14 |
| Total fat (g)                                | 836                                  | 0.18   | 0.33 | 140                             | 0.16   | 0.24 | 7                         | 0.31   | 0.38  | 493                     | 1.05   | 3.47  | 18             | 0.65   | 0.69  |
| Saturated fat (g)                            | 749                                  | 0.11   | 0.20 | 131                             | 0.10   | 0.14 | 5                         | 0.04   | 0.05  | 389                     | 2.22   | 2.71  | 10             | 0.53   | 0.30  |
| Carbohydrate (g)                             | 867                                  | 0.32   | 0.90 | 769                             | 0.19   | 1.61 | 130                       | 0.87   | 2.58  | 942                     | 2.72   | 8.30  | 184            | 0.36   | 1.97  |
| Total sugar (g)                              | 860                                  | 0.46   | 1.01 | 742                             | 0.24   | 1.64 | 130                       | 1.09   | 2.85  | 942                     | 1.50   | 3.48  | 183            | 0.41   | 2.00  |
| Protein (g)                                  | 849                                  | 0.46   | 0.51 | 152                             | 0.33   | 0.39 | 50                        | 1.27   | 0.50  | 504                     | 0.94   | 1.40  | 28             | 0.18   | 0.26  |
| <b>Nutrient Ratios (LP/NFL)</b>              |                                      |        |      |                                 |        |      |                           |        |       |                         |        |       |                |        |       |
| Calories                                     | 867                                  | 1.01   | 0.13 | 769                             | 1.02   | 0.18 | 130                       | 1.00   | 0.08  | 942                     | 0.99   | 0.29  | 184            | 1.00   | 0.09  |
| Total fat                                    | 836                                  | 1.05   | 0.31 | 140                             | 0.96   | 0.32 | 7                         | 0.97   | 0.46  | 493                     | 1.10   | 0.33  | 18             | 0.59   | 0.47  |
| Saturated fat                                | 749                                  | 0.96   | 0.25 | 131                             | 0.92   | 0.30 | 5                         | 1.01   | 0.07  | 389                     | 0.89   | 0.39  | 10             | 0.71   | 0.42  |
| Carbohydrate                                 | 867                                  | 1.01   | 0.15 | 769                             | 1.00   | 0.16 | 130                       | 1.01   | 0.07  | 942                     | 1.01   | 0.28  | 184            | 1.01   | 0.08  |
| Total sugar                                  | 860                                  | 0.93   | 0.19 | 742                             | 0.99   | 0.19 | 130                       | 1.01   | 0.08  | 942                     | 1.00   | 0.16  | 183            | 1.02   | 0.19  |
| Protein                                      | 849                                  | 1.06   | 0.27 | 152                             | 0.89   | 0.39 | 50                        | 0.23   | 0.32  | 504                     | 1.03   | 0.28  | 28             | 1.08   | 0.74  |
| <b>Added sugar estimate (per 100g)</b>       |                                      |        |      |                                 |        |      |                           |        |       |                         |        |       |                |        |       |
| Among all UPCs                               | 867                                  | 6.22   | 3.64 | 769                             | 7.18   | 4.88 | 130                       | 36.11  | 14.41 | 942                     | 66.17  | 26.23 | 184            | 19.25  | 11.26 |
| Among UPCs with NFL total sugar >0g          | 860                                  | 6.27   | 3.61 | 742                             | 7.44   | 4.77 | 130                       | 36.11  | 14.41 | 942                     | 66.17  | 26.23 | 183            | 19.36  | 11.20 |
| <b>Added sugar as % of :</b>                 |                                      |        |      |                                 |        |      |                           |        |       |                         |        |       |                |        |       |
| total sugar among UPCs with total sugar >0g  | 860                                  | 65.58% |      | 742                             | 90.52% |      | 130                       | 81.38% |       | 942                     | 91.28% |       | 183            | 93.19% |       |
| calories among UPCs with total sugar >0g     | 860                                  | 33.80% |      | 742                             | 79.62% |      | 130                       | 77.64% |       | 942                     | 67.73% |       | 183            | 84.40% |       |
| calories among UPCs with added sugar >0g     | 829                                  | 34.58% |      | 712                             | 82.68% |      | 124                       | 81.53% |       | 901                     | 70.34% |       | 174            | 85.33% |       |
| <b>Other Diagnostics</b>                     |                                      |        |      |                                 |        |      |                           |        |       |                         |        |       |                |        |       |
| % with LP added sugar ≤ NFL total sugar      |                                      | 97.23% |      |                                 | 98.57% |      |                           | 91.54% |       |                         | 93.95% |       |                | 95.11% |       |
| Median total error per nutrient and weight   |                                      | 0.034  |      |                                 | 0.008  |      |                           | 0.065  |       |                         | 0.136  |       |                | 0.012  |       |

**Notes:** LP= Linear programming; NFL= Nutrition Facts Label; UPC= Universal Product Code; SD= Standard deviation.

Estimated values from LP model when fruit juice and fruit juice concentrate not considered an added sugar. Added sugar (g) values only include the proportion of added sugar ingredients that are sugar. Some beverage categories contain both regular and low calorie products. Ns represent products with non-missing or non-zero NFP values. <sup>†</sup> in order to be consistent with the sample sizes presented for the Nutrient Ratios, we have limited these to the same products.

**Appendix C. Results of small validation test and 'manufacturer  $\leq 2\%$ ' constraint sensitivity test based on 15 known formulations.**

| A. Chocolate Milk                | Formula 1    |                             |                          | Formula 2    |                             |                          | Formula 3    |                             |                          |
|----------------------------------|--------------|-----------------------------|--------------------------|--------------|-----------------------------|--------------------------|--------------|-----------------------------|--------------------------|
|                                  | Actual grams | Without $\leq 2\%$ LP grams | With $\leq 2\%$ LP grams | Actual grams | Without $\leq 2\%$ LP grams | With $\leq 2\%$ LP grams | Actual grams | Without $\leq 2\%$ LP grams | With $\leq 2\%$ LP grams |
| Ingredient (per 100g of product) |              |                             |                          |              |                             |                          |              |                             |                          |
| 1% Lowfat Milk                   | 95.65        | 95.90                       | 93.81                    | 93.5         | 93.70                       | 91.67                    | 90.65        | 90.95                       | 88.83                    |
| Sugar ‡                          | 2.50         | 2.48                        | 2.54                     | 5.00         | 5.02                        | 5.12                     | 7.50         | 7.70                        | 7.88                     |
| Alkalized cocoa                  | 1.50         | 0.93                        | 1.10                     | 1.50         | 0.86                        | 0.85                     | 1.50         | 0.93                        | 0.97                     |
| Salt                             | 0.15         | 0.14                        | 0.15                     | 0.15         | 0.14                        | 0.13                     | 0.15         | 0.14                        | 0.13                     |
| Carrageenan                      | 0.10         | 0.14                        | 0.07                     | 0.10         | 0.14                        | 0.23                     | 0.10         | 0.14                        | 0.18                     |
| Artificial Chocolate Flavor      | 0.10         | 0.14                        | 2.00                     | 0.10         | 0.14                        | 2.00                     | 0.10         | 0.14                        | 2.00                     |
| Vitamin A Palmitate              | 0.0008       | 0.14                        | 0.00                     | 0.0008       | 0.00                        | 0.00                     | 0.0008       | 0.00                        | 0.00                     |
| Vitamin D3                       | 0.00004      | 0.14                        | 0.33                     | 0.00004      | 0.00                        | 0.00                     | 0.00004      | 0.00                        | 0.00                     |
| <b>Added Sugar</b>               | 2.50         | 2.48                        | 2.54                     | 5.00         | 5.018                       | 5.12                     | 7.50         | 7.70                        | 7.88                     |
| <b>Total Sugar</b>               | 7.30         | 7.30                        | 7.30                     | 9.64         | 9.64                        | 9.64                     | 11.94        | 12.19                       | 12.16                    |
| <hr/>                            |              |                             |                          |              |                             |                          |              |                             |                          |
| B. Cranberry Grape Drink         | Formula 1    |                             |                          | Formula 2    |                             |                          |              |                             |                          |
|                                  | Actual grams | Without $\leq 2\%$ LP grams | With $\leq 2\%$ LP grams | Actual grams | Without $\leq 2\%$ LP grams | With $\leq 2\%$ LP grams |              |                             |                          |
| Ingredient (per 100g of product) |              |                             |                          |              |                             |                          |              |                             |                          |
| Water                            | 74.19        | 76.24                       | 75.91                    | 50.69        | 52.21                       | 50.34                    |              |                             |                          |
| Grape Juice from Concentrate     | 12.50        | 12.95                       | 11.55                    | 40.50        | 32.86                       | 32.88                    |              |                             |                          |
| Sugar ‡                          | 10.50        | 10.38                       | 10.40                    | 6.00         | 6.32                        | 6.32                     |              |                             |                          |
| Cranberry Juice from Concentrate | 2.50         | 0.15                        | 2.00                     | 2.50         | 6.32                        | 6.32                     |              |                             |                          |
| Black Carrot Juice (for color)   | 0.16         | 0.15                        | 0.00                     | 0.16         | 2.00                        | 2.00                     |              |                             |                          |
| Sodium Citrate                   | 0.13         | 0.15                        | 0.15                     | 0.13         | 0.14                        | 0.14                     |              |                             |                          |
| Ascorbic Acid                    | 0.03         | 0.00                        | 0.00                     | 0.03         | 0.14                        | 2.00                     |              |                             |                          |
| <b>Added Sugar</b>               | 10.50        | 10.38                       | 10.39                    | 6.00         | 6.32                        | 6.32                     |              |                             |                          |
| <b>Total Sugar</b>               | 12.47        | 12.47                       | 12.47                    | 12.09        | 12.31                       | 12.31                    |              |                             |                          |

---

**Appendix C (cont.) Results of small validation test and ‘manufacturer  $\leq 2\%$ ’ constraint sensitivity test based on 15 known formulations**


---

| C. Egnog            | Formula 1    |                             |                          | Formula 2    |                             |                          |
|---------------------|--------------|-----------------------------|--------------------------|--------------|-----------------------------|--------------------------|
|                     | Actual grams | Without $\leq 2\%$ LP grams | With $\leq 2\%$ LP grams | Actual grams | Without $\leq 2\%$ LP grams | With $\leq 2\%$ LP grams |
| Milk                | 63.00        | 63.60                       | 63.53                    | 50.00        | 45.66                       | 49.01                    |
| Sugar ‡             | 9.00         | 10.94                       | 10.82                    | 18.00        | 19.42                       | 18.72                    |
| Cream               | 9.00         | 10.94                       | 10.82                    | 12.00        | 14.87                       | 14.51                    |
| Skim Milk           | 8.80         | 4.69                        | 4.70                     | 7.80         | 4.89                        | 4.84                     |
| Corn Syrup ‡        | 5.00         | 4.69                        | 4.70                     | 7.00         | 4.89                        | 4.84                     |
| Egg yolks           | 5.00         | 4.69                        | 4.70                     | 5.00         | 4.89                        | 4.84                     |
| Water               | 0.11         | 0.16                        | 0.02                     | 0.11         | 4.89                        | 2.00                     |
| Carrageenan         | 0.05         | 0.16                        | 0.16                     | 0.05         | 0.17                        | 0.15                     |
| Nutmeg              | 0.04         | 0.16                        | 0.55                     | 0.04         | 0.17                        | 0.00                     |
| Vitamin A Palmitate | 0.0008       | 0.00                        | 0.00                     | 0.0008       | 0.17                        | 1.09                     |
| <b>Added Sugar</b>  | 11.53        | 13.30                       | 13.19                    | 21.54        | 21.87                       | 21.15                    |
| <b>Total Sugar</b>  | 16.58        | 16.58                       | 16.58                    | 26.51        | 24.38                       | 24.04                    |

---

| D. Vegetable juice drink      | Formula 1    |                             |                          | Formula 2    |                             |                          |
|-------------------------------|--------------|-----------------------------|--------------------------|--------------|-----------------------------|--------------------------|
|                               | Actual grams | Without $\leq 2\%$ LP grams | With $\leq 2\%$ LP grams | Actual grams | Without $\leq 2\%$ LP grams | With $\leq 2\%$ LP grams |
| Water                         | 44.41        | 34.43                       | 34.43                    | 76.39        | 71.83                       | 71.83                    |
| Tomato Juice from Concentrate | 40.00        | 34.43                       | 34.43                    | 10.00        | 11.27                       | 11.27                    |
| Carrot Juice from concentrate | 10.00        | 26.27                       | 26.27                    | 7.00         | 10.30                       | 10.30                    |
| Sugar ‡                       | 5.50         | 4.88                        | 4.88                     | 6.52         | 6.21                        | 6.21                     |
| Citric Acid                   | 0.04         | 0.00                        | 0.00                     | 0.04         | 0.20                        | 0.00                     |
| Malic Acid                    | 0.03         | 0.00                        | 0.00                     | 0.03         | 0.20                        | 0.39                     |
| Ascorbic Acid                 | 0.03         | 0.00                        | 0.00                     | 0.03         | 0.00                        | 0.00                     |
| <b>Added Sugar</b>            | 5.50         | 4.87                        | 4.87                     | 6.52         | 6.21                        | 6.21                     |
| <b>Total Sugar</b>            | 7.37         | 7.02                        | 7.02                     | 6.98         | 6.98                        | 6.98                     |

---

**Appendix C (cont.) Results of small validation test and ‘manufacturer  $\leq 2\%$ ’ constraint sensitivity test based on 15 known formulations**

| E. Smoothie concentrate          | Formula 1    |                             |                          | Formula 2    |                             |                          |
|----------------------------------|--------------|-----------------------------|--------------------------|--------------|-----------------------------|--------------------------|
|                                  | Actual grams | Without $\leq 2\%$ LP grams | With $\leq 2\%$ LP grams | Actual grams | Without $\leq 2\%$ LP grams | With $\leq 2\%$ LP grams |
| Ingredient (per 100g of product) |              |                             |                          |              |                             |                          |
| Strawberry Puree                 | 45.00        | 38.61                       | 38.61                    | 30.00        | 29.91                       | 29.91                    |
| Sugar ‡                          | 39.00        | 38.61                       | 38.61                    | 29.00        | 29.91                       | 29.91                    |
| Apple Juice Concentrate          | 10.00        | 10.20                       | 10.20                    | 27.00        | 24.13                       | 24.14                    |
| Water                            | 5.72         | 10.11                       | 10.20                    | 13.72        | 10.44                       | 8.85                     |
| Natural Strawberry Flavor        | 0.10         | 1.24                        | 0.00                     | 0.10         | 2.00                        | 2.00                     |
| Xanthan Gum                      | 0.07         | 1.24                        | 1.24                     | 0.07         | 1.20                        | 1.20                     |
| Ascorbic Acid                    | 0.06         | 0.00                        | 0.00                     | 0.06         | 1.20                        | 2.00                     |
| Black Carrot Juice (for color)   | 0.05         | 0.00                        | 1.15                     | 0.05         | 1.20                        | 2.00                     |
| Green Tea Powder                 | 0.001        | 0.00                        | 0.00                     | 0.001        | 0.00                        | 0.00                     |
| <b>Added Sugar</b>               | <b>39.00</b> | <b>38.58</b>                | <b>38.58</b>             | <b>29.00</b> | <b>29.88</b>                | <b>29.88</b>             |
| <b>Total Sugar</b>               | <b>48.19</b> | <b>47.42</b>                | <b>47.42</b>             | <b>48.19</b> | <b>47.12</b>                | <b>47.12</b>             |

  

| F. Fruit punch drink             | Formula 1    |                             |                          | Formula 2    |                             |                          | Formula 3    |                             |                          | Formula 4    |                             |                          |
|----------------------------------|--------------|-----------------------------|--------------------------|--------------|-----------------------------|--------------------------|--------------|-----------------------------|--------------------------|--------------|-----------------------------|--------------------------|
|                                  | Actual grams | Without $\leq 2\%$ LP grams | With $\leq 2\%$ LP grams | Actual grams | Without $\leq 2\%$ LP grams | With $\leq 2\%$ LP grams | Actual grams | Without $\leq 2\%$ LP grams | With $\leq 2\%$ LP grams | Actual grams | Without $\leq 2\%$ LP grams | With $\leq 2\%$ LP grams |
| Ingredient (per 100g of product) |              |                             |                          |              |                             |                          |              |                             |                          |              |                             |                          |
| Water                            | 87.74        | 88.11                       | 88.11                    | 85.54        | 86.05                       | 86.05                    | 85.44        | 85.79                       | 85.79                    | 81.99        | 82.96                       | 82.96                    |
| Sugar ‡                          | 11.20        | 11.42                       | 11.42                    | 7.30         | 7.59                        | 7.59                     | 7.10         | 7.11                        | 7.11                     | 1.00         | 1.58                        | 1.58                     |
| White Grape Juice Concentrate    | 1.00         | 0.48                        | 0.48                     | 7.10         | 6.37                        | 6.37                     | 7.40         | 7.11                        | 7.11                     | 16.95        | 15.19                       | 15.19                    |
| Citric Acid                      | 0.04         | 0.00                        | 0.00                     | 0.04         | 0.00                        | 0.00                     | 0.04         | 0.00                        | 0.00                     | 0.04         | 0.26                        | 0.26                     |
| Ascorbic Acid                    | 0.03         | 0.00                        | 0.00                     | 0.03         | 0.00                        | 0.00                     | 0.03         | 0.00                        | 0.00                     | 0.03         | 0.00                        | 0.00                     |
| <b>Added Sugar</b>               | <b>11.20</b> | <b>11.41</b>                | <b>11.41</b>             | <b>7.30</b>  | <b>7.58</b>                 | <b>7.58</b>              | <b>7.10</b>  | <b>7.10</b>                 | <b>7.10</b>              | <b>1.00</b>  | <b>1.58</b>                 | <b>1.58</b>              |
| <b>Total Sugar</b>               | <b>11.72</b> | <b>11.71</b>                | <b>11.71</b>             | <b>11.72</b> | <b>11.66</b>                | <b>11.66</b>             | <b>11.72</b> | <b>11.65</b>                | <b>11.65</b>             | <b>11.30</b> | <b>11.30</b>                | <b>11.30</b>             |

**Notes:** LP= Linear programming

‡ denotes defined as an added sugar; fruit juice and fruit juice concentrate not considered an added sugar. Added sugar (g) values only include the proportion of added sugar ingredients that are sugar.
